# Supplementary material
Source: HighWire-hosted journal article supplement (https://care.diabetesjournals.org/content/suppl/2006/09/14/29.6.1269)
Supplement: Pg1269OnlineAppendix.pdf [file Pg1269OnlineAppendix.pdf]

**Table A.** Baseline characteristics of the people with type 2 diabetes studied (ITT population).

|                                                | <b>Insulin detemir</b> | <b>NPH insulin</b>   |
|------------------------------------------------|------------------------|----------------------|
| Number randomized (n)                          | 237                    | 238                  |
| Sex (M/F %)                                    | 49.4 / 50.6            | 56.7 / 43.3          |
| Ethnic origin (n)<br>(black/white/Asian/other) | 1/232/4/0              | 0/237/0/1            |
| Age (years)                                    | 61.3 (9.1) 40–80       | 60.4 (9.3) 27–79     |
| Weight (kg)                                    | 82.7 (13.3) 44–128     | 82.5 (14.2) 42.2–126 |
| BMI (kg/m <sup>2</sup> )                       | 28.9 (3.6) 18.1–35.7   | 29.0 (3.6) 18.3–35.6 |
| Duration of diabetes (years)                   | 9.6 (6.6) 1–40         | 9.8 (6.2) 1–36       |
| Complications (%)                              |                        |                      |
| retinopathy                                    | 10                     | 9                    |
| neuropathy                                     | 17                     | 16                   |
| nephropathy                                    | 5                      | 7                    |
| macroangiopathy                                | 27                     | 22                   |
| HbA <sub>1c</sub> (%)                          | 8.61 (0.78) 7.0–10.3   | 8.51 (0.76) 6.2–10.4 |
| OGLD use (%)                                   |                        |                      |
| metformin alone                                | 5.9                    | 8.0                  |
| secretagogue alone                             | 28.7                   | 26.5                 |
| acarbose alone                                 | –                      | 0.4                  |
| combination therapy                            | 65.4                   | 65.1                 |

Data are n, % or mean (SD) range.

OGLD, oral glucose-lowering drug

HbA<sub>1c</sub> reference range <6.1 %

**Table B.** Hypoglycemia episodes and relative risk of hypoglycemia.

| Episode          | Insulin detemir   |             |                     | NPH insulin       |             |                     | Relative risk<br>RR [95% CI]) | p      |
|------------------|-------------------|-------------|---------------------|-------------------|-------------|---------------------|-------------------------------|--------|
|                  | n=237             |             |                     | n=238             |             |                     |                               |        |
|                  | patients<br>n (%) | events<br>n | events/<br>pt.-year | patients<br>n (%) | events<br>n | events/<br>pt.-year |                               |        |
| <b>All</b>       |                   |             |                     |                   |             |                     |                               |        |
| any              | 151<br>(64)       | 908         | 8.60                | 191<br>(80)       | 1688        | 15.96               | 0.53<br>[0.42–0.68]           | <0.001 |
| minor            | 96 (41)           | 387         | 3.67                | 153<br>(64)       | 755         | 7.14                | 0.48<br>[0.35–0.65]           | <0.001 |
| symptoms only    | 124<br>(52)       | 519         | 4.92                | 160<br>(67)       | 923         | 8.73                | 0.56<br>[0.42–0.74]           | <0.001 |
| major            | 1 (0)             | 1           | 0.01                | 6 (3)             | 8           | 0.08                | – <sup>a</sup>                | –      |
| <b>Nocturnal</b> |                   |             |                     |                   |             |                     |                               |        |
| any              | 71 (30)           | 160         | 1.52                | 112<br>(47)       | 349         | 3.30                | 0.45<br>[0.32–0.64]           | <0.001 |
| minor            | 40 (17)           | 74          | 0.70                | 84 (35)           | 187         | 1.77                | 0.39<br>[0.26–0.58]           | <0.001 |
| symptoms only    | 51 (22)           | 86          | 0.81                | 59 (25)           | 161         | 1.52                | 0.54<br>[0.34–0.85]           | 0.008  |
| major            | 0 (0)             | 0           | 0.00                | 1 (0)             | 1           | 0.01                | – <sup>a</sup>                | –      |

*‘Minor’ episodes are episodes not requiring assistance and confirmed by capillary plasma glucose measurement (<3.1 mmol/L). ‘Symptoms only’ are reported episodes for which either no plasma glucose measurement was taken or where the plasma glucose value was ≥3.1 mmol/L.*

<sup>a</sup>*relative risk not calculated because of small numbers*

**Figure A.** Patient disposition during study

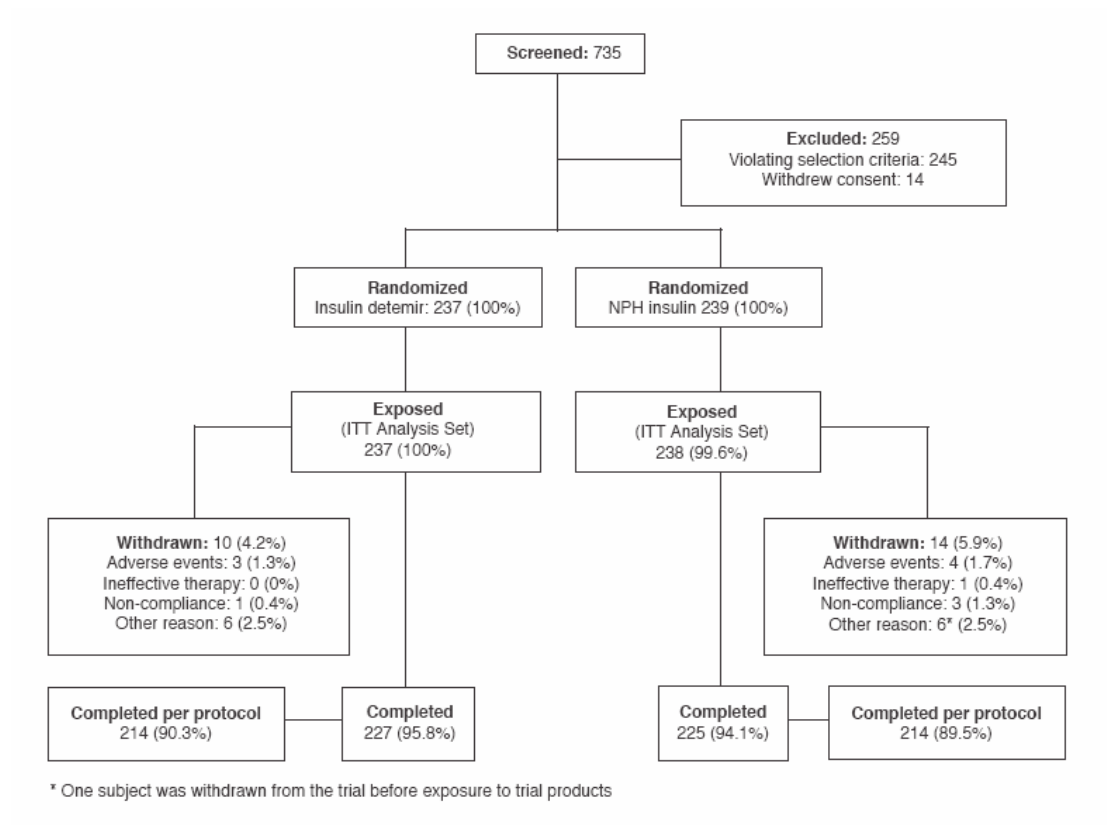

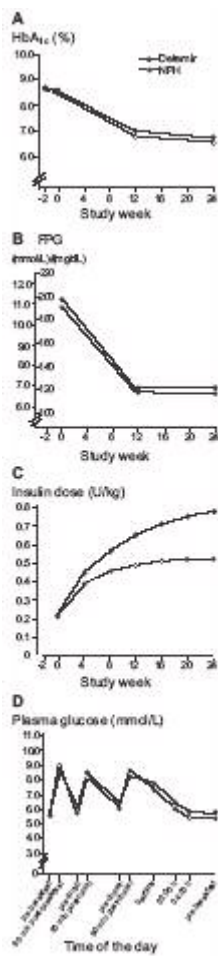

**Figure B.** Glycemic control and dose:

A) Change in HbA<sub>1c</sub> over time

B) Change in FPG over time

C) Change in dose over time

D) Participant-measured plasma glucose profiles after 24 weeks' treatment with insulin detemir and NPH insulin. Measurements were made at 10 time points, including breakfast the following day. Data contribution cohort: Insulin detemir, n=224; NPH insulin, n=223. Data are estimated means. All SE values <0.19 mmol/L.

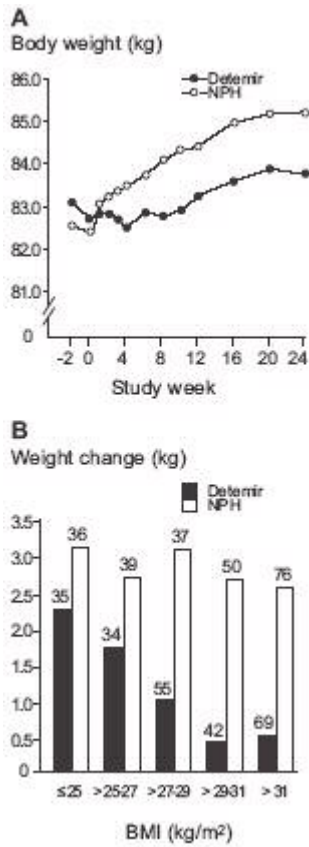

**Figure C.** Body weight change

A) Mean body weight with time of study on insulin detemir and NPH insulin. Baseline adjusted weight was statistically different ( $p < 0.001$  – see text) at 24 weeks.

B) Change in mean body weight by treatment group stratified by baseline BMI. Numbers over bars are number of participants.

## **Acknowledgements and duality of interest**

KH, MD, TD, and PH have received support, personally or to their departments, from Novo Nordisk in the context of this and other studies or for consultation. MD and PH have also acted similarly for other companies with products named in this paper.

GMR and PC are employees of Novo Nordisk. This manuscript was prepared with assistance from Watermeadow Medical, Witney, Oxfordshire, UK. The study has been previously reported in abstract form: *Diabetologia* 47(Suppl. 1):A273, 2004; *Diabetes* 54(Suppl 1):A67, 2005.

We would like to thank the following investigators (the Levemir treat-to-target study group) and their co-workers and patients for their participation in the trial: Belgium: Dr. Alfred Chachati, Dr. André Bodson, Dr. Eric Weber. Croatia: Prof. Izet Aganović, Dr. Ljiljana Jović Paškvalin. Denmark: Dr. Klaus Kølendorf, Dr. Henrik Michael Hansen, Prof. Jens Sandahl Christiansen, Dr. Hans Perrild, Dr. Kirsten Nørgaard, Dr. Peder Bjerg Christiansen, Dr. Henrik Ancher Sørensen, Dr. Peter Anders Christensen. France: Dr. Claude Le Devehat, Dr. Daniel Ben Soussan, Dr. Alice Benoit, Dr. Jean Cheikel, Dr. Pierre Duvezin-Caubet, Dr. Thierry Gabreau, Dr. Michel Issa-Sayegh, Dr. Marc Levy, Dr. Pierre Serusclat, Prof. Alain Dubreuil. Macedonia: Prof. Milco Bogoev. Norway: Dr. Stefnir Gudnason, Dr. Atle Myklebust, Dr. Roger Ove Apelseth, Dr. Svein Skeie, Dr. Odd Erik Johansen, Dr. Sverre Madsbu. Poland: Dr. Stanisław Niemczyk, Dr. Lilianna Majkowska, Dr. Anna Mikołajczyk-Swatko, Dr. Ewa Jarosz-Skokowska, Dr. Ewa Gączarek-Belczyk, Prof. Waldemar Karnafel, Dr. Janusz Krassowski, Dr. Małgorzata Bednarczyk-Kałużny, Dr. Robert Filipczak, Dr. Janusz Marek Gumprecht, Dr. Krzysztof Mruk. Russia: Prof. Galina Melnichenko, Dr. Serguey Choustov, Dr. Alsou Zalevskaya, Prof. Irina Demidova, Prof. Mikhail

Balabolkin, Dr. Olga Smirnova. Slovakia: Dr. Marta Korecova. Sweden: Dr. Johan Jendle, Dr. Anders Frid, Dr. Mona Landin-Olsson, Prof. Hans Arnquist, Dr. Peter Hallgren, Dr. Stina Lindmark, Dr. Ola Norrhamn, Dr. Bo Gustav Polhem.
